# Supplementary material for: Tafenoquine treatment of Plasmodium vivax malaria: suggestive evidence that CYP2D6 reduced metabolism is not associated with relapse in the Phase 2b DETECTIVE trial
Source: PubMed Central journal article supplement (PMC4757974; doi:10.1186/s12936-016-1145-5), 2016-02-18

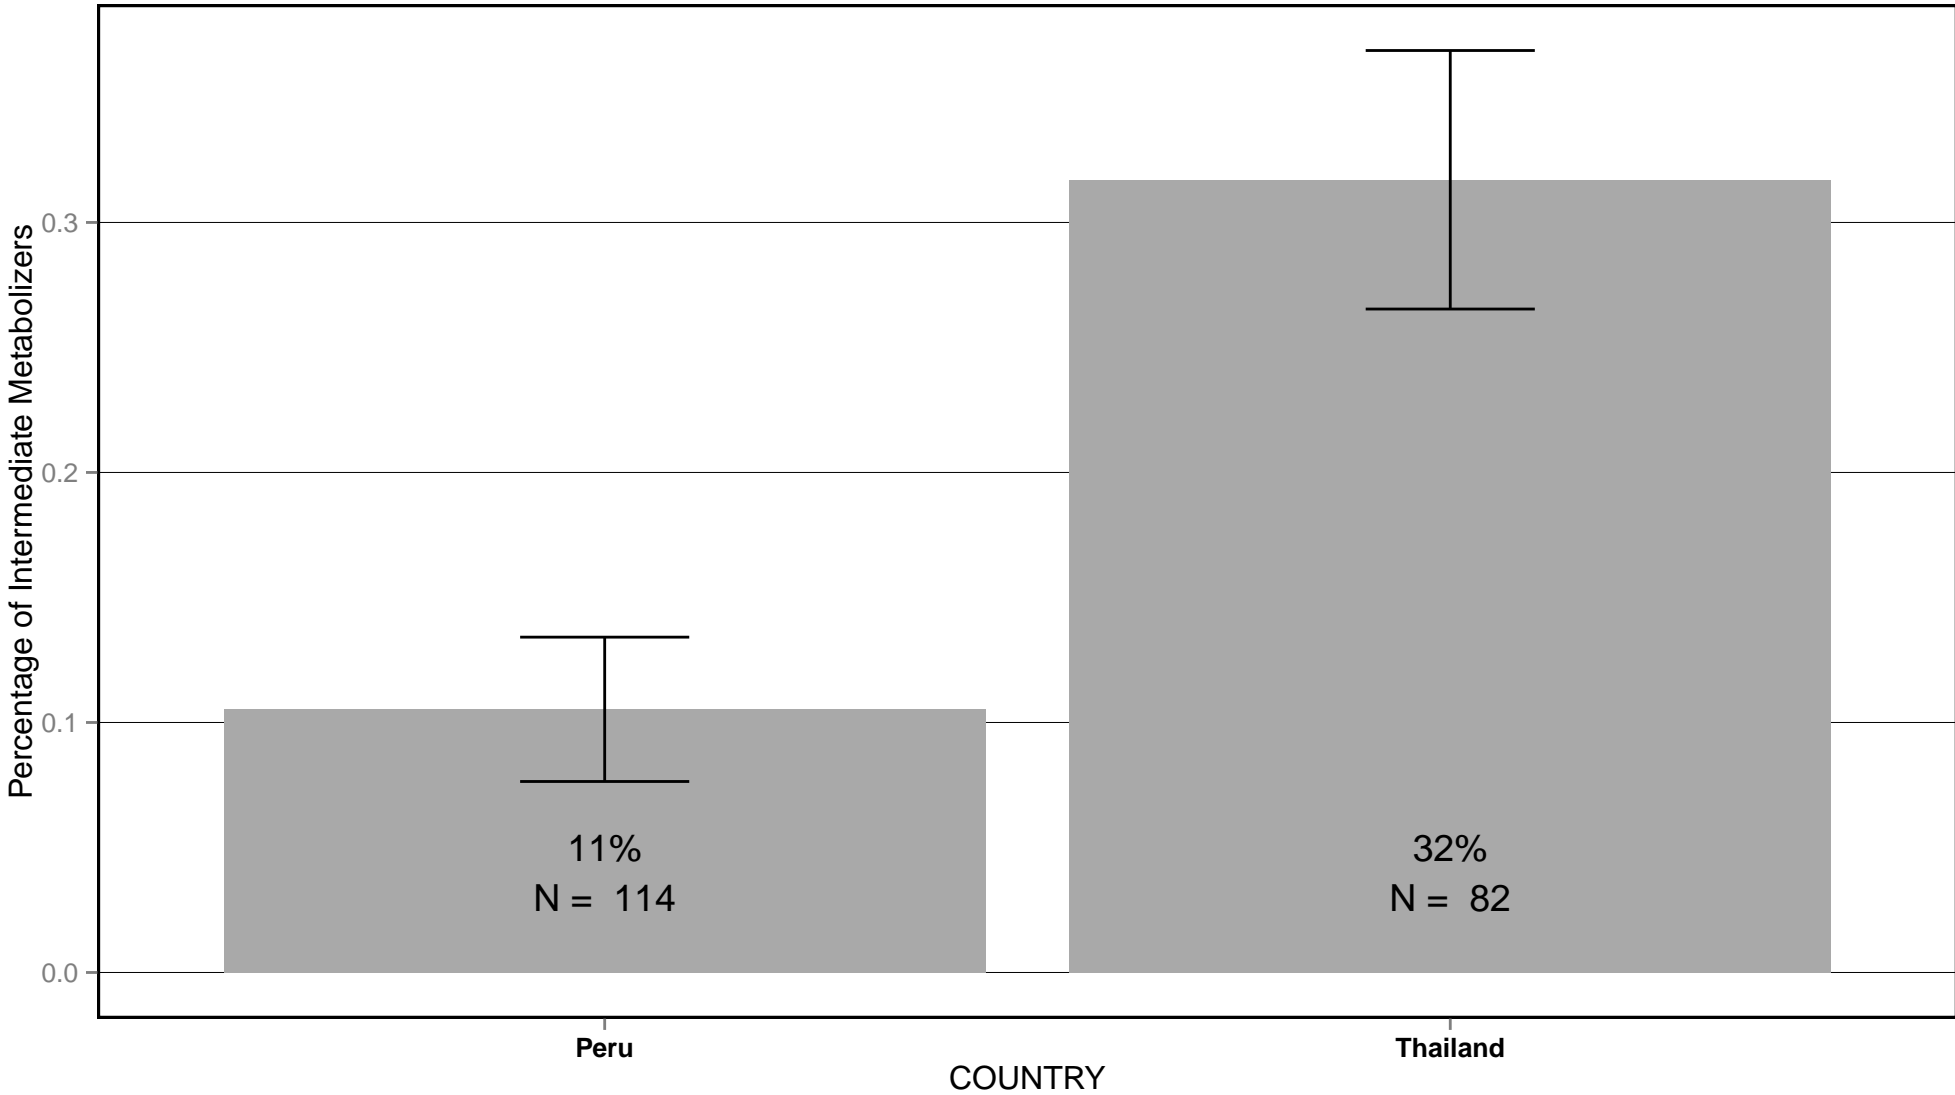

Supplement: 12936_2016_1145_MOESM1_ESM.pdf [file 12936_2016_1145_MOESM1_ESM.pdf]
