# Supplementary material for: Tafenoquine treatment of Plasmodium vivax malaria: suggestive evidence that CYP2D6 reduced metabolism is not associated with relapse in the Phase 2b DETECTIVE trial
Source: Springer Nature journal article supplement (doi:10.1186/s12936-016-1145-5), 2016-02-18

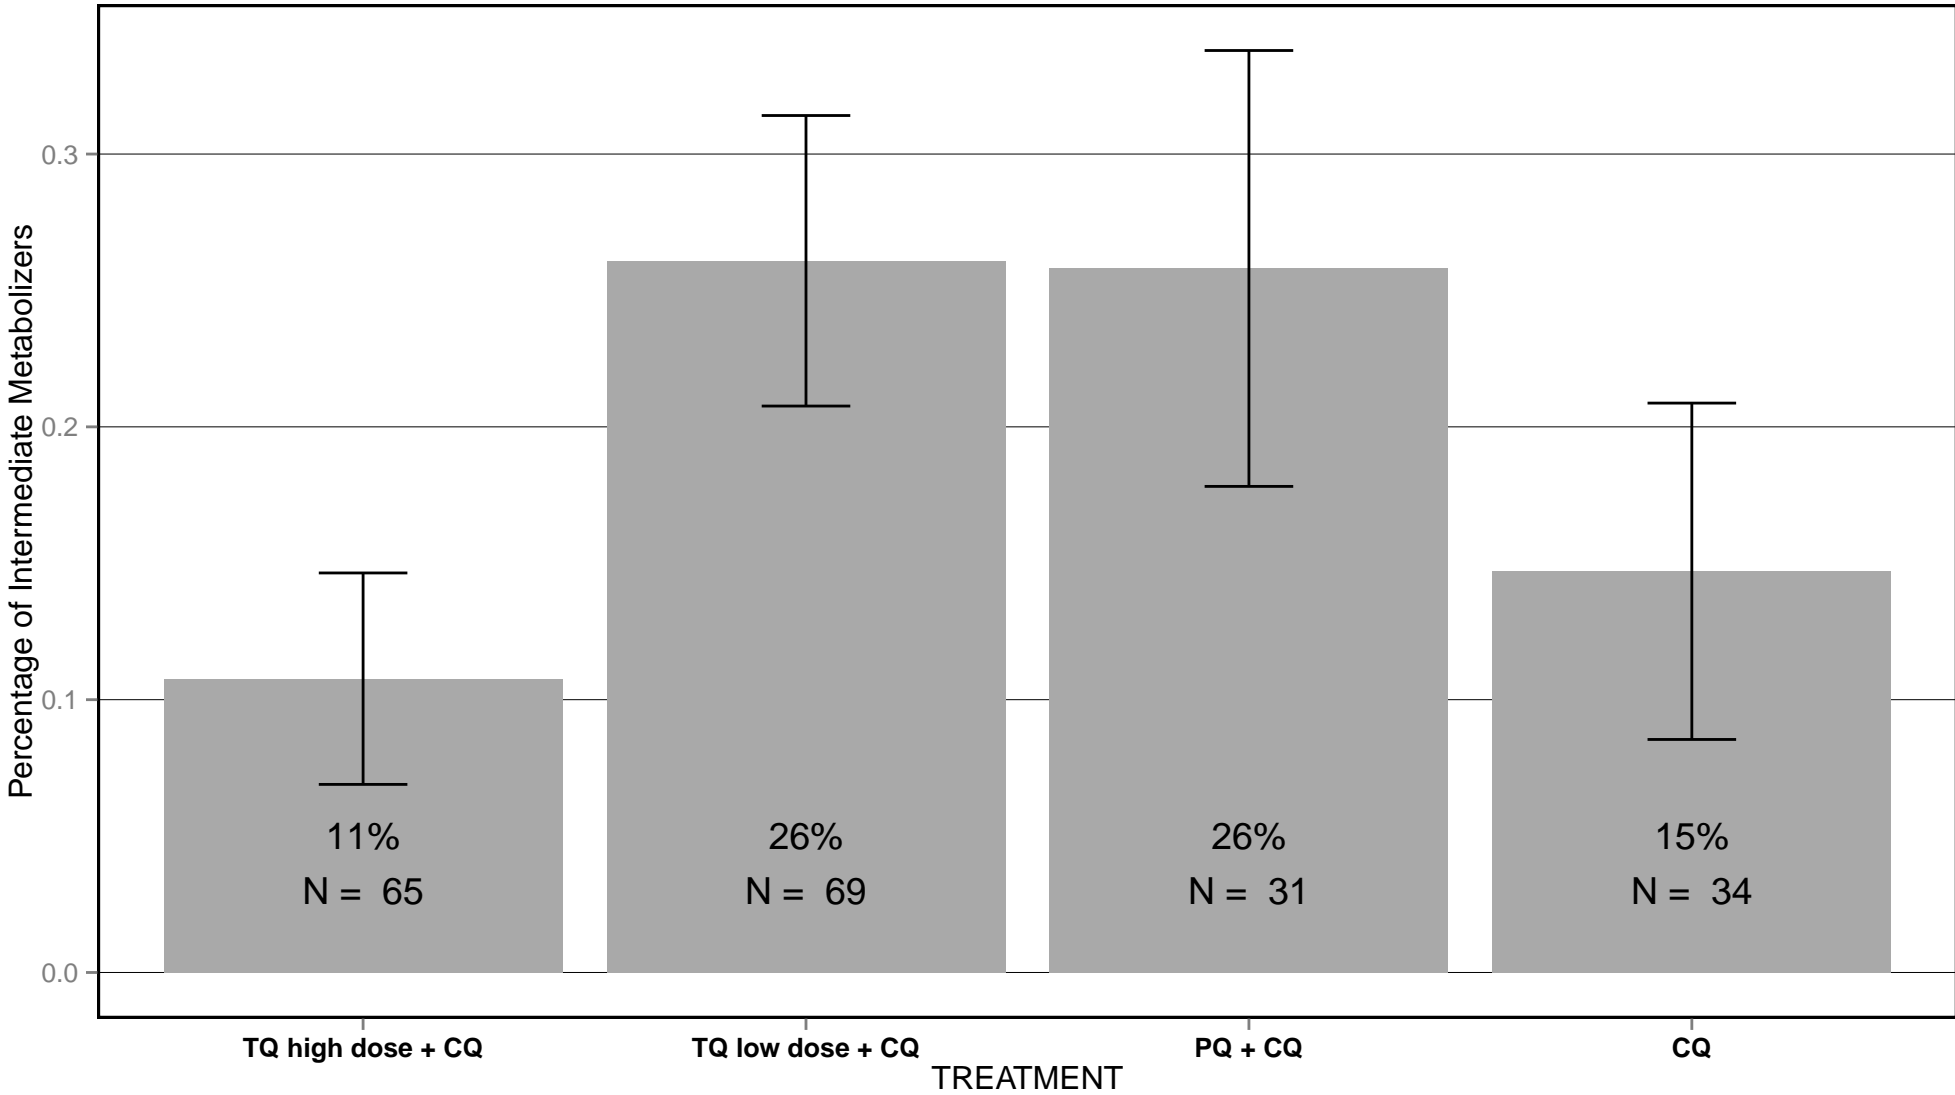

Supplement: MOESM2 [file 9762154]
